# Supplementary material for: Lactose and Galactose Promote the Crystallization of Human Galectin-10
Source: MDPI journal article supplement (doi:10.3390/molecules28041979), 2023-02-19
Supplement: s1 [file s1]

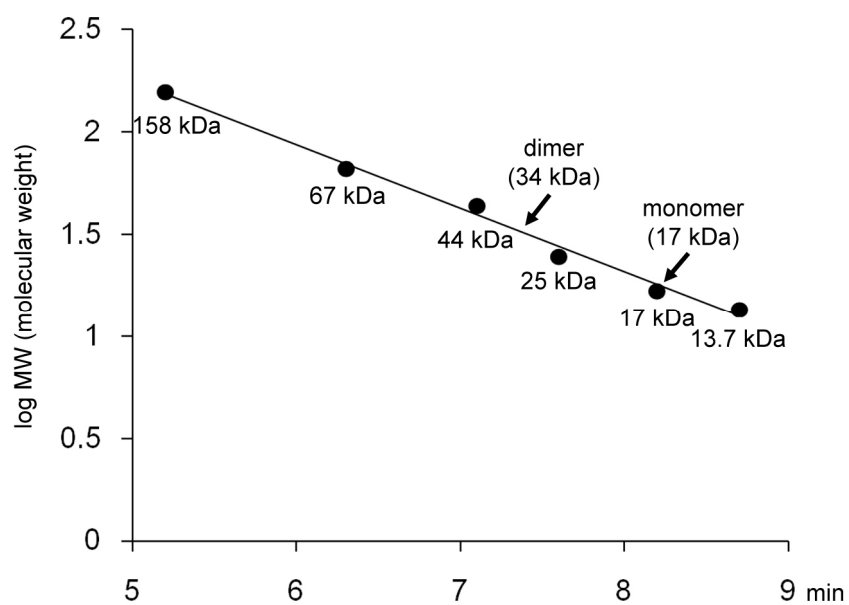

**Figure S1.** The column calibration line of SEC. Separation of the monomers (17 kDa) and dimers (34 kDa) of Gal-10 was performed by size-exclusion HPLC with a Sphergel-TSK-2000SW SEC column. The column was calibrated with molecular mass markers as indicated in the figure.

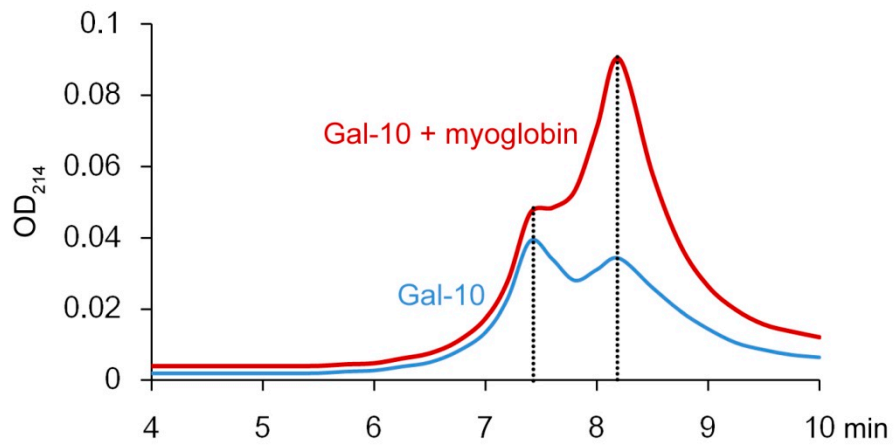

**Figure S2.** SEC HPLC of Gal-10 and myoglobin. Gal-10 was diluted to 10  $\mu$ M and incubated for 2 h. Then the Gal-10 monomers (17 kDa) and dimers (34 kDa) with or without 10  $\mu$ M myoglobin (16.7 kDa) were subjected to SEC HPLC with the PBS–azide buffer (pH 7.4).

The image displays a gel electrophoresis result with six lanes. Lanes 1 through 5 each contain a single, prominent DNA band at a molecular weight of approximately 100 base pairs. Lane 6, which serves as a control, contains a single band at a higher molecular weight of approximately 200 base pairs. The bands are stained with a blue dye, likely ethidium bromide, and are clearly visible against the light background of the gel.

**Figure S3.** Native PAGE of Gal-10 monomers and dimers. Gal-10 was diluted to 10  $\mu$ M and incubated with or without 1 mM lactose, galactose, sucrose, or glucose for 2 h. For analyzing the monomer–dimer equilibrium of Gal-10, the gel was stained with Coomassie Blue R-250.

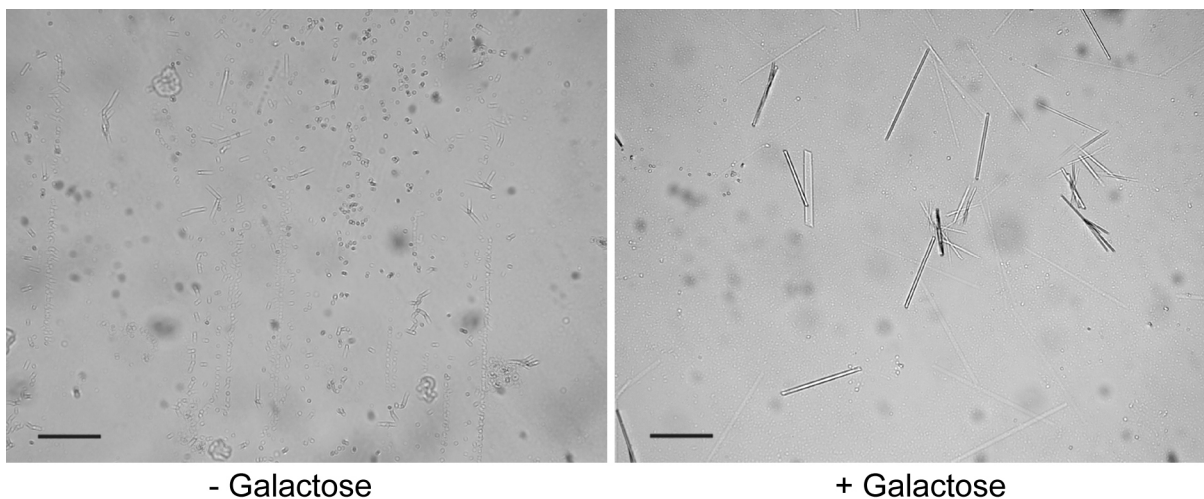

**Figure S4.** Effect of galactose on crystallization of Gal-10 proteins without His-tag. Recombinant His-tagged Gal-10 was digested with TEV protease to remove the tag. Then Gal-10 without His-tag was diluted to 10  $\mu\text{M}$  in PBS–azide buffer with 0.01% Coomassie brilliant blue R-250 and incubated with or without 1 mM galactose for 24 h. The crystals were observed under a light microscope. Bar = 50  $\mu\text{M}$ .

**Table S1.** Quantitative data (percentages) of Gal-10 monomers and dimers as shown in Figure 1.

| Treatment                                     | dimer        | monomer      |
|-----------------------------------------------|--------------|--------------|
| 100 $\mu$ M Gal-10 for 2 h                    | 89% $\pm$ 2% | 11% $\pm$ 2% |
| 10 $\mu$ M Gal-10 for 2 h                     | 62% $\pm$ 4% | 38% $\pm$ 4% |
| 1 $\mu$ M Gal-10 for 2 h                      | 18% $\pm$ 3% | 82% $\pm$ 3% |
| 10 $\mu$ M Gal-10 for 0 h                     | 95% $\pm$ 1% | 5% $\pm$ 1%  |
| 10 $\mu$ M Gal-10 for 12 h                    | 28% $\pm$ 3% | 72% $\pm$ 3% |
| 10 $\mu$ M Gal-10 for 24 h                    | 10% $\pm$ 2% | 90% $\pm$ 2% |
| 10 $\mu$ M Gal-10 with 1 mM lactose for 2 h   | 87% $\pm$ 2% | 13% $\pm$ 2% |
| 10 $\mu$ M Gal-10 with 1 mM galactose for 2 h | 88% $\pm$ 2% | 12% $\pm$ 2% |
| 10 $\mu$ M Gal-10 with 1 mM sucrose for 2 h   | 63% $\pm$ 4% | 37% $\pm$ 4% |
| 10 $\mu$ M Gal-10 with 1 mM glucose for 2 h   | 63% $\pm$ 4% | 37% $\pm$ 4% |

Mean values with the standard deviations of three independent replicates are shown.
